# Supplementary material
Source: Springer Nature journal article supplement (https://www.springermedizin.de/resource/supplementary/12906_2008_215_MOESM3_ESM.pdf/9524294)

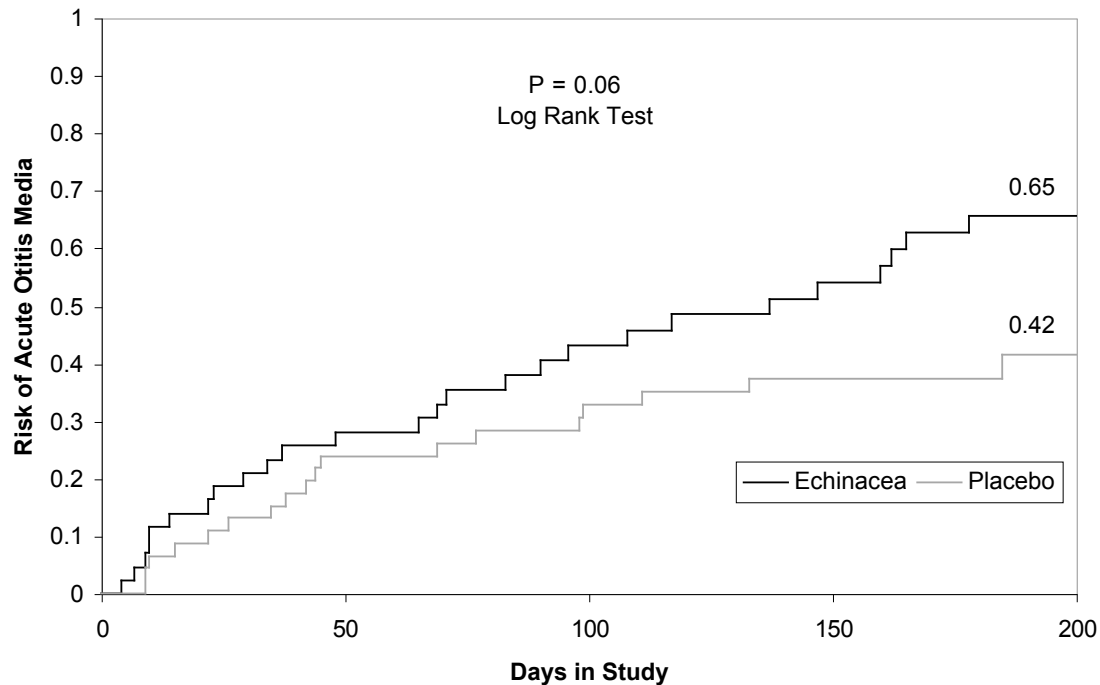

**No. at Risk**

|           |    |    |    |    |   |
|-----------|----|----|----|----|---|
| Echinacea | 44 | 30 | 21 | 16 | 4 |
| Placebo   | 46 | 35 | 30 | 28 | 8 |

Supplement: MOESM3 [file 9524294]
